# Supplementary material for: Exploring Toxin Genes of Myanmar Russell’s Viper, Daboia siamensis, through De Novo Venom Gland Transcriptomics
Source: MDPI journal article supplement (doi:10.3390/toxins15050309), 2023-04-26
Supplement: s1 [file s1]

## Supplementary Materials

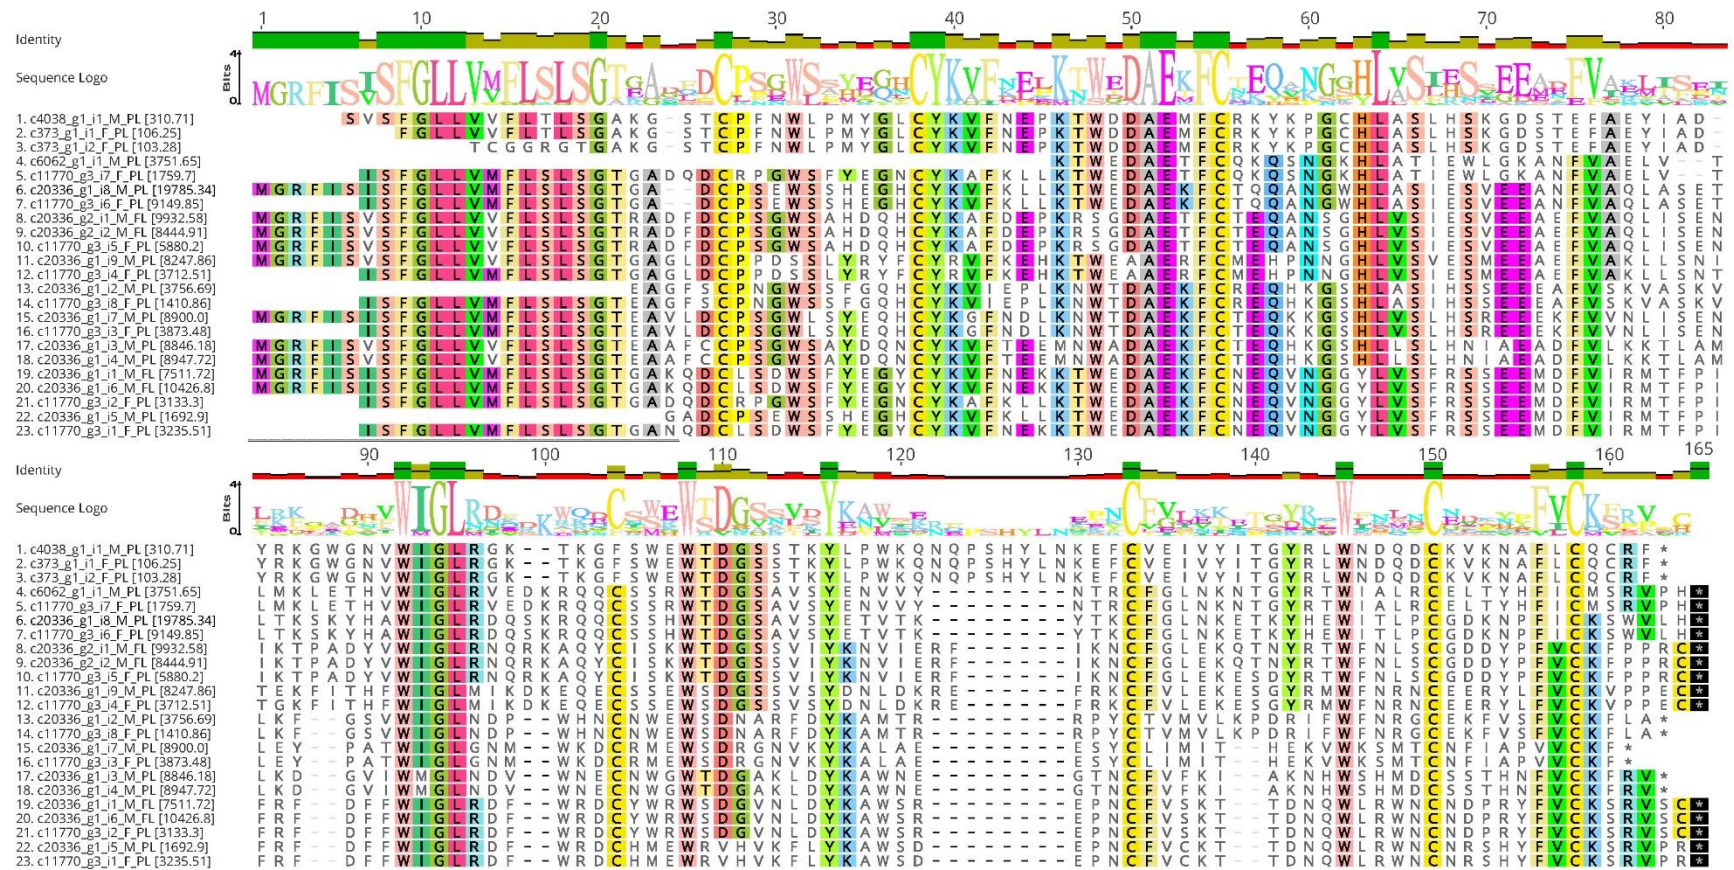

**Figure S1.** Clustal Omega sequence alignment of the polypeptides encoded by 23 transcripts candidate C-type lectins from Myanmar *D. siamensis*. Signal peptide was underlined, with conserved residues (>50%) highlighted throughout the alignment. Six of the cysteine residues were highly conserved, with each protein having typically 8 cysteine residues. The CTL conserved motif WIGL was highly conserved (position 92-95). The program Geneious Prime 2023.0.2 was used to create this alignment, with SeqLogo [1] to highlight highly conserved amino acid residues. Expression values (TPM) were included in brackets following sequence name.

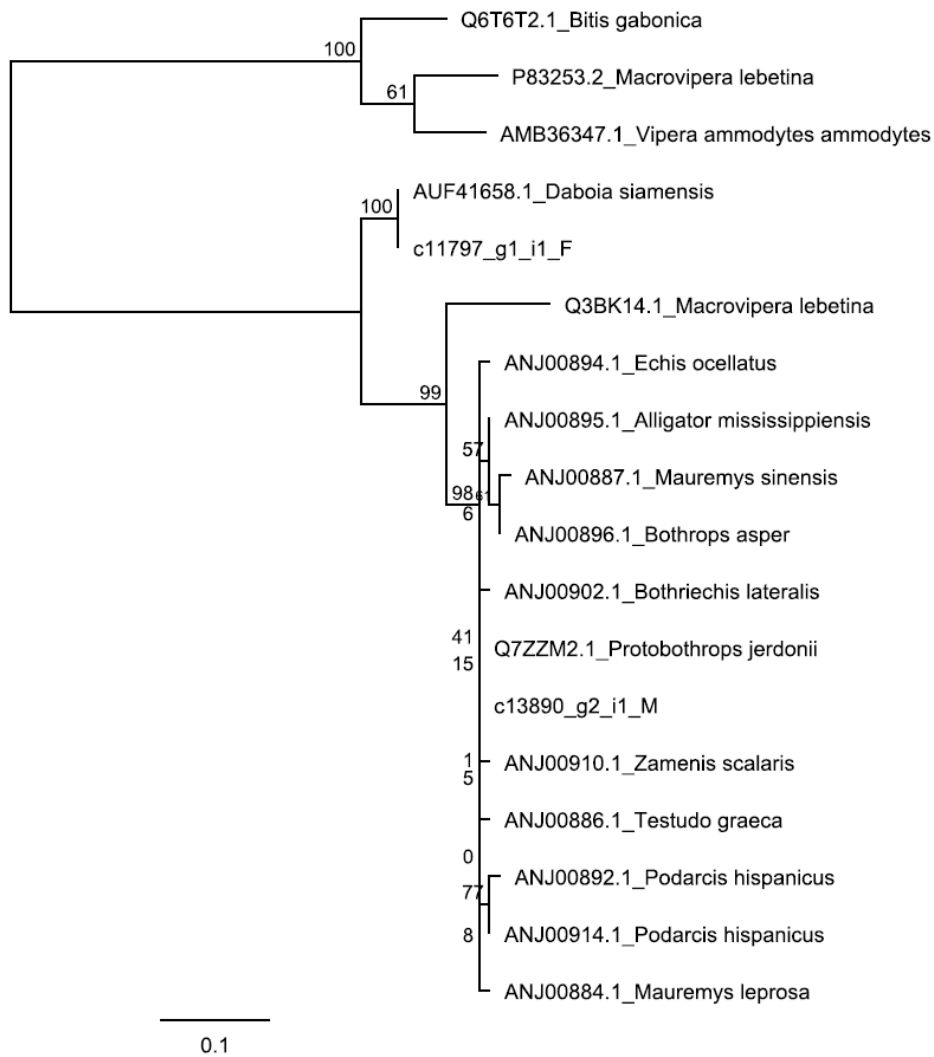

**Figure S2.** The gene tree analysis of the disintegrins from Myanmar *D. siamensis*, Dis1a (c13890\_g2\_i1\_M) and Dis1b (c11797\_g1\_i1\_F), with disintegrins from other species.

```

RVV_Vγ      -----MVLIKVLANLLVLQLSYAQKSELVVGDEININEHPFLVALYTSASSTI 50
c20548_g3_i4_M_FL -----MVLIRVLANLLVLQLSYAQKSELVVGDEININEHPFLVALYTSASSTI 50
c11820_g1_i1_F_PL -----MVLIRVLANLLVLQLSYAQKSELVVGDEININEHPFLVALYTSASSTI 50
c11820_g1_i3_F_PL MNSLPCRVEAMVLIRVLANLLVLQLSYAQKSELVVGDEININEHPFLVALYTSASSTI 60
c11820_g1_i4_F_PL MNSLPCRVEAMVLIRVLANLLVLQLSYAQKSELVVGDEININEHPFLVALYTSASSTI 60
                ****.******

RVV_Vγ      HCAGALINREWVLTAAHCDRRNIRIKLGMHSKNIRNEDEQIRVPRGKYFGLNTKFPNGLD 110
c20548_g3_i4_M_FL HCAGALINREWVLTAAHCDRRNIRIKLGMHSKNIRNEDEQIRVPRGKYFGLNTKFPNGLD 110
c11820_g1_i1_F_PL HCAGALINREWVLTAAHCDRRNIRIKLGMHSKNIRNEDEQIRVPRGKYFGLNTKFPNGLD 110
c11820_g1_i3_F_PL HCAGALINREWVLTAAHCDRRNIRIKLGMHSKNIRNEDEQIRVPRGKYFGLNTKFPNGLD 120
c11820_g1_i4_F_PL HCAGALINREWVLTAAHCDRRNIRIKLGMHSKNIRNEDEQIRVPRGKYFGLNTKFPNGLD 120
                *****

RVV_Vγ      KDI MLIRLRPVTYSTHIAPVSLPSRSRGVGSRRIMGWGKISTEDTYPDVPHGTNIFI 170
c20548_g3_i4_M_FL KDI MLIRLRPVTYSTHIAPVSLPSRSRGVGSRRIMGWGKIST--DTYPDVPHGTNIFI 168
c11820_g1_i1_F_PL KDI MLIRLRPVTYSTHIAPVSLPSRSRGVGSRRIMGWGKIST--DTYPDVPHGTNIFI 168
c11820_g1_i3_F_PL KDI MLIRLRPVTYSTHIAPVSLPSRSRGVGSRRIMGWGKIST--DTYPDVPHGTNIFI 178
c11820_g1_i4_F_PL KDI MLIRLRPVTYSTHIAPVSLPSRSRGVGSRRIMGWGKIST--DTYPDVPHGTNIFI 178
                *****

RVV_Vγ      VKHKWLEPLYPWVPADSRITLAGILKGGRTCHGDSGGPLICNGEMHGIVAGGSEPCGQH 230
c20548_g3_i4_M_FL VKHKWLEPLYPWVPADSRITLAGILKGGRTCHGDSGGPLICNGEMHGIVAGGSEPCGQH 228
c11820_g1_i1_F_PL VKHKWLEPLYPWVPADSRITLAGILKGGRTCHGDSGGPLICNGEMHGIVAGGSEPCGQH 228
c11820_g1_i3_F_PL VKHKWLEPLYPWVPADSRITLAGILKGGRTCHGDSGGPLICNGEMHGIVAGGSEPCGQH 238
c11820_g1_i4_F_PL VKHKWLEPLYPWVPADSRITLAGILKGGRTCHGDSGGPLICNGEMHGIVAGGSEPCGQH 238
                *****

RVV_Vγ      LKPAVYTKVFDYNWNIQSI IAGNRTVTCP- 260
c20548_g3_i4_M_FL LKPAVYTKVFDYNWNIQSI IAGNRTVTCPP* 258
c11820_g1_i1_F_PL LKPAVYTKVFDYN----- 241
c11820_g1_i3_F_PL LKPAVYTKVFDYN----- 251
c11820_g1_i4_F_PL LKPAVYTKVFDYN----- 251
                *****

```

**Figure S3.** Sequence alignment of RVV-V<sub>γ</sub> from *Daboia siamensis* and deduced amino acid sequences of transcripts from the transcriptomes. Signal peptide is single-underlined. Catalytic triad His57, Asp102 and Ser195 are highlighted in yellow. Cysteine residues for 6 disulfide bridge are highlighted in green. (\*) fully conserved residues; (;) strongly similar residues; (.) weakly similar residues.

```

c13118_g1_i1_M_FL MAAYLLAVAILFCIQGWPSGTVQGVQRPFPDVYQRSACQTRETLSVILQEHPDEISDIFR 60
c22505_g1_i1_F_FL MAAYLLAVAILFCIQGWPSGTVQGVQRPFPDVYQRSACQTRETLSVILQEHPDEISDIFR 60
VR_1              MAAYLLAVAILFCIQGWPSGTVQGVQRPFPDVYERSACQTRETLSVILQEHPDEISDIFR 60
                *****

c13118_g1_i1_M_FL PSCVAVLRCSGCCTDESMKCTPVGKHTADIQIMRMNPRTHSSKMEVMKFMEHTACECRPR 120
c22505_g1_i1_F_FL PSCVAVLRCSGCCTDESMKCTPVGKHTADIQIMRMNPRTHSSKMEVMKFMEHTACECRPR 120
VR_1              PSCVAVLRCSGCCTDESMKCTPVGKHTADIQIMRMNPRTHSSKMEVMKFMEHTACECRPR 120
                *****

c13118_g1_i1_M_FL WKQGEPEGPKPEPRRGE*----- 136
c22505_g1_i1_F_FL WKQGEPEGPKPEPRRGE*----- 136
VR_1              WKQGEPEGPKPEPRRGVRAKFPFD 144
                *****

```

**Figure S4.** Sequence alignment of deduced amino acid sequences of VEGF transcripts with VR-1 from *D. russelii* (P67861). Signal peptide is single-underlined. Cysteine residues are in yellow color. (\*) fully conserved residues; (;) strongly similar residues; (.) weakly similar residues.

|                    |                                                               |     |
|--------------------|---------------------------------------------------------------|-----|
| c11787_g15_i2_F_PL | -----                                                         | 0   |
| DrLAO              | MNVFFMFSLFLATLGSCADDKNPLEECFREDDYEEFLEIAKNGLKKTSPKHIIVVGAG    | 60  |
| c17343_g1_i1_M_FL  | MNVFFMFSLFLATLGSCADDKNPLEECFREDDYEEFLEIAKNGLKKTSPKHIIVVGAG    | 60  |
| c11787_g15_i1_F_FL | MNVFFMFSLFLATLGSCADDKNPLEECFREDDYEEFLEIAKNGLKKTSPKHIIVVGAG    | 60  |
| c11787_g15_i2_F_PL | -----MSSVTVLEASERPGGVRVTRHNVKEGWYANLGPMPVPEKHRIIREYI          | 47  |
| DrLAO              | MSGLSAAYVLAGAGHKVTVLEASERPGGVRVTRHNVKEGWYANLGPMPVPEKHRIIREYI  | 120 |
| c17343_g1_i1_M_FL  | MSGLSAAYVLAGAGHKVTVLEASERPGGVRVTRHNVKEGWYANLGPMPVPEKHRIIREYI  | 120 |
| c11787_g15_i1_F_FL | MSGLSAAYVLAGAGHKVTVLEASERPGGVRVTRHNVKEGWYANLGPMPVPEKHRIIREYI  | 120 |
|                    | .*****                                                        |     |
| c11787_g15_i2_F_PL | RKFGLKLNFEVQETENGWYFIKNIRKRVGEVKKDPGLLKYPVKPSEAGKSAGQLYQESLG  | 107 |
| DrLAO              | RKFGLKLNFEVQETENGWYFIKNIRKRVGEVKKDPGLLKYPVKPSEAGKSAGQLYQESLG  | 180 |
| c17343_g1_i1_M_FL  | RKFGLKLNFEVQETENGWYFIKNIRKRVGEVKKDPGLLKYPVKPSEAGKSAGQLYQESLG  | 180 |
| c11787_g15_i1_F_FL | RKFGLKLNFEVQETENGWYFIKNIRKRVGEVKKDPGLLKYPVKPSEAGKSAGQLYQESLG  | 180 |
|                    | *****                                                         |     |
| c11787_g15_i2_F_PL | KAHEELKRTNCSYILNKYDTYSTKEYLIKEGNLSPGAVDMIGDLLNEDSGYYVSFIESLK  | 167 |
| DrLAO              | KAHEELKRTNCSYILNKYDTYSTKEYLIKEGNLSPGAVDMIGDLLNEDSGYYVSFIESLK  | 240 |
| c17343_g1_i1_M_FL  | KAHEELKRTNCSYILNKYDTYSTKEYLIKEGNLSPGAVDMIGDLLNEDSGYYVSFIESLK  | 240 |
| c11787_g15_i1_F_FL | KAHEELKRTNCSYILNKYDTYSTKEYLIKEGNLSPGAVDMIGDLLNEDSGYYVSFIESLK  | 240 |
|                    | *****                                                         |     |
| c11787_g15_i2_F_PL | HDDIFAYEKRFEIVGGMDQLPTSMYRAIEESVRFKARVIKIQQNAEKVTVTYQTTQKNL   | 227 |
| DrLAO              | HDDIFAYEKRFEIVGGMDQLPTSMYRAIEESVRFKARVIKIQQNAEKVTVTYQTTQKNL   | 300 |
| c17343_g1_i1_M_FL  | HDDIFAYEKRFEIVGGMDQLPTSMYRAIEESVRFKARVIKIQQNAEKVTVTYQTTQKNL   | 300 |
| c11787_g15_i1_F_FL | HDDIFAYEKRFEIVGGMDQLPTSMYRAIEESVRFKARVIKIQQNAEKVTVTYQTTQKNL   | 300 |
|                    | *****                                                         |     |
| c11787_g15_i2_F_PL | LLETVDYVIVCTTSRAARRITFKPPLPPKKAHALRSVHYRSGTKIFLTCTKKFWEDDGIQ  | 287 |
| DrLAO              | LLETADYVIVCTTSRAARRITFKPPLPPKKAHALRSVHYRSGTKIFLTCTKKFWEDDGIQ  | 360 |
| c17343_g1_i1_M_FL  | LLETVDYVIVCTTSRAARRITFKPPLPPKKAHALRSVHYRSGTKIFLTCTKKFWEDDGIQ  | 360 |
| c11787_g15_i1_F_FL | LLETVDYVIVCTTSRAARRITFKPPLPPKKAHALRSVHYRSGTKIFLTCTKKFWEDDGIQ  | 360 |
|                    | ***.*****                                                     |     |
| c11787_g15_i2_F_PL | GGKSTTDLPSRFIYYPNHNFTTGVGVI IAYGIGDDANFFQALNLNECADIVFNDLSSIHQ | 347 |
| DrLAO              | GGKSTTDLPSRFIYYPNHNFTTGVGVI IAYGIGDDANFFQALNLNECADIVFNDLSSIHQ | 420 |
| c17343_g1_i1_M_FL  | GGKSTTDLPSRFIYYPNHNFTTGVGVI IAYGIGDDANFFQALNLNECADIVFNDLSSIHQ | 420 |
| c11787_g15_i1_F_FL | GGKSTTDLPSRFIYYPNHNFTTGVGVI IAYGIGDDANFFQALNLNECADIVFNDLSSIHQ | 420 |
|                    | *****                                                         |     |
| c11787_g15_i2_F_PL | LPKKDLQTFQYPSIIQKWSLDKYAMGAITTFPTYQFQHFSEALTAPVGRIFFAGEYTANA  | 407 |
| DrLAO              | LPKKDLQTFQYPSIIQKWSLDKYAMGAITTFPTYQFQHFSEALTAPVGRIFFAGEYTANA  | 480 |
| c17343_g1_i1_M_FL  | LPKKDLQTFQYPSIIQKWSLDKYAMGAITTFPTYQFQHFSEALTAPVGRIFFAGEYTANA  | 480 |
| c11787_g15_i1_F_FL | LPKKDLQTFQYPSIIQKWSLDKYAMGAITTFPTYQFQHFSEALTAPVGRIFFAGEYTANA  | 480 |
|                    | *****                                                         |     |
| c11787_g15_i2_F_PL | HGWIDSTIKSGLTAARDVNRASEL*                                     | 431 |
| DrLAO              | HGWIDSTIKSGLTAARDVNRASEL-                                     | 504 |
| c17343_g1_i1_M_FL  | HGWIDSTIKSGLTAARDVNRASEL*                                     | 504 |
| c11787_g15_i1_F_FL | HGWIDSTIKSGLTAARDVNRASEL*                                     | 504 |
|                    | *****                                                         |     |

**Figure S5.** Sequence alignment of DrLAO (*Daboia russelii*, **G8XQX1.1**) with 3 deduced LAAO transcripts obtained from Myanmar Russell's viper transcriptome. Conserved FAD-binding motif and Ile<sup>1</sup>-Hse<sup>11</sup> fragment is highlighted in green. Three potential N-glycosylation sites are underlined. Cysteine residues making disulfide bridge are highlighted in blue. Key residues in catalytic site are highlighted in yellow. (\*) fully conserved residues; (;) strongly similar residues; (.) weakly similar residues.

|                |                                    |                      |                             |     |
|----------------|------------------------------------|----------------------|-----------------------------|-----|
| c55720_g1_i1_M | <u>MIAFIVLPILA</u> AVLQSSGSVDFDSES | PRKPEIQNEIVDLHNSLR   | SVTPTASNMLKMEW              | 60  |
| c17345_g1_i1_F | <u>MIAFIVLPILA</u> AVLQSSGSVDFDSES | PRKPEIQNEIVDLHNSLR   | SVTPTASNMLKMEW              | 60  |
| Dr_CRPK        | <u>MIAFIVLPILA</u> AVLQSSGSVDFDSES | PRRPEIQNEIVDLHNSLR   | SVTPTASNMLKMEW              | 60  |
| *****.*****    |                                    |                      |                             |     |
| c55720_g1_i1_M | YPEAANAERWAFRCILNHSPYNSRVIGGIK     | GENIYMSPYPMKWT       | AIHEWHDEKKDFV               | 120 |
| c17345_g1_i1_F | YPEAANAERWAFRCILNHSPYNSRVIGGIK     | GENIYMSPYPMKWT       | AIHEWHDEKKDFV               | 120 |
| Dr_CRPK        | YPEAANAERWAFRCILNHSPYNSRVIGGIK     | GENIYMSPYPMKWT       | AIHEWHKEKKDFV               | 120 |
| *****.         |                                    |                      |                             |     |
| c55720_g1_i1_M | YGQGASPANAVVGHYTQVVWYKSYRSG        | AAAYCP               | SSSEYNFYVVCQYCPAGNIIGKIATPY | 180 |
| c17345_g1_i1_F | YGQGASPANAVVGHYTQVVWYKSYRSG        | AAAYCP               | SSSEYNFYVVCQYCPAGNIIGKIATPY | 180 |
| Dr_CRPK        | YGQGASPANAVVGHYTQIVWYKSYRSG        | AAAYCP               | SSSEYNFYVVCQYCPAGNIIGKIATPY | 180 |
| *****.*****    |                                    |                      |                             |     |
| c55720_g1_i1_M | TSGPFCGDCPSACDNGLC                 | TNPSHHDDFTNCKDLVKQGC | HSNYLKTCKPASCFCHNEII        | 239 |
| c17345_g1_i1_F | TSGPFCGDCPSACDNGLC                 | TNPSHHDDFTNCKDLVKQGC | HSNYLKTCKPASCFCHNEII        | 239 |
| Dr_CRPK        | TSGPFCGDCPSACDNGLC                 | TNPSHHDEFNCKDLVKQGC  | HSNYLKTCKPASCFCHNEII        | 239 |
| *****.*****    |                                    |                      |                             |     |

**Figure S6.** Sequence alignment of deduced amino acid sequences of CRISP transcripts from the transcriptomes with cysteine-rich secretory protein Dr-CRPK from Taiwan Russell's viper (ACE73567). Signal peptide is single-underlined. Cysteine residues are in pink color. The two Zn<sup>2+</sup> binding motifs are highlighted in yellow and blue. (\*) fully conserved residues; (:) strongly similar residues; (.) weakly similar residues.

## References

1. Bembom, O.; Ivanek, R. seqLogo: Sequence logos for DNA sequence alignments. R package version 1.64.0. Available online: <https://bioconductor.org/packages/release/bioc/html/seqLogo.html> (accessed on 26 March 2022).
