# Supplementary material for: Exploring Toxin Genes of Myanmar Russell’s Viper, Daboia siamensis, through De Novo Venom Gland Transcriptomics
Source: MDPI journal article supplement (doi:10.3390/toxins15050309), 2023-04-26
Supplement: s1 [file s1]

**Supplementary Table S3.** Transcripts with snake venom C-type lectin (CTL) annotations

| Subtype. | Contig ID         | Top Blast Hit Description        | Accession  | Species                           | Length | TPM value |
|----------|-------------------|----------------------------------|------------|-----------------------------------|--------|-----------|
| I        | c4038_g1_i1_M_PL  | C-type lectin 1                  | Q6T7B7     | <i>Bitis gabonica</i>             | 154    | 310.71    |
| I        | c373_g1_i2_F_PL   | C-type lectin 1                  | Q6T7B7     | <i>Bitis gabonica</i>             | 147    | 103.28    |
| I        | c373_g1_i1_F_PL   | C-type lectin 1                  | Q6T7B7     | <i>Bitis gabonica</i>             | 151    | 106.25    |
| II       | c20336_g1_i2_M_PL | p31 beta subunit                 | K9JDF6     | <i>Daboia siamensis</i>           | 130    | 3756.69   |
| II       | c11770_g3_i8_F_PL | p31 beta subunit                 | K9JDF6     | <i>Daboia siamensis</i>           | 145    | 1410.86   |
| III      | c20336_g1_i7_M_PL | RVV-X light chain 1              | A0A2H4Z2X7 | <i>Daboia siamensis</i>           | 151    | 8900.00   |
| III      | c11770_g3_i3_F_PL | RVV-X light chain 1              | A0A2H4Z2X7 | <i>Daboia siamensis</i>           | 141    | 3873.48   |
| IV       | c20336_g2_i1_M_FL | p68 alpha subunit                | K9JBV0     | <i>Daboia siamensis</i>           | 194    | 8064.14   |
| IV       | c20336_g2_i2_M_FL | p68 alpha subunit                | K9JBV0     | <i>Daboia siamensis</i>           | 159    | 8444.91   |
| IV       | c11770_g3_i5_F_PL | Snaclec A15                      | B4XSZ0.1   | <i>Macrovipera lebetina</i>       | 221    | 5880.20   |
| V        | c20336_g1_i8_M_PL | Snaclec dabocetin subunit alpha  | Q38L02     | <i>Daboia siamensis</i>           | 190    | 19785.34  |
| V        | c11770_g3_i6_F_PL | Snaclec dabocetin subunit alpha  | Q38L02     | <i>Daboia siamensis</i>           | 149    | 9149.85   |
| V        | c6062_g1_i1_M_PL  | Snaclec A12                      | B4XSY7     | <i>Macrovipera lebetina</i>       | 110    | 7503.30   |
| V        | c11770_g3_i7_F_PL | Snaclec A12                      | B4XSY7     | <i>Microvipera lebetina</i>       | 149    | 1759.70   |
| VI       | c20336_g1_i9_M_PL | Factor X activator light chain 2 | K9JDJ1     | <i>Daboia siamensis</i>           | 163    | 8247.86   |
| VI       | c11770_g3_i4_F_PL | Factor X activator light chain 2 | K9JDJ1     | <i>Daboia siamensis</i>           | 153    | 3712.51   |
| VII      | c20336_g1_i3_M_PL | p68 beta subunit                 | K9JCR4     | <i>Daboia russelii limitis</i>    | 188    | 7182.11   |
| VII      | c20336_g1_i4_M_PL | p68 beta subunit                 | K9JCR4     | <i>Daboia russelii limitis</i>    | 159    | 7264.55   |
| VII      | c20336_g1_i1_M_FL | Snaclec 7                        | Q4PRC6     | <i>Daboia siamensis</i>           | 171    | 6098.68   |
| VII      | c20336_g1_i6_M_FL | Snaclec 7                        | Q4PRC6     | <i>Daboia siamensis</i>           | 190    | 7182.11   |
| VII      | c11770_g3_i2_F_PL | Snaclec 7                        | Q4PRC6     | <i>Daboia siamensis</i>           | 145    | 3133.30   |
| VII      | c20336_g1_i5_M_PL | Snaclec-7                        | A0A1J0CZM7 | <i>Vipera ammodytes ammodytes</i> | 128    | 1692.90   |
| VII      | c11770_g3_i1_F_PL | Snaclec 7                        | Q4PRC6     | <i>Daboia siamensis</i>           | 145    | 3235.51   |
