# Supplementary material for: Exploring Toxin Genes of Myanmar Russell’s Viper, Daboia siamensis, through De Novo Venom Gland Transcriptomics
Source: MDPI journal article supplement (doi:10.3390/toxins15050309), 2023-04-26
Supplement: s1 [file s1]

**Supplementary Table S4.** QUAST reports of assembled transcriptomes by two different assemblers

| Assembly tools               | Trinity    |            | CLC Genomics |            |
|------------------------------|------------|------------|--------------|------------|
| Samples                      | Male       | Female     | Male         | Female     |
| Total number of contigs      | 33,106     | 20,248     | 23,791       | 16,930     |
| Largest contig (bp)          | 31,422     | 17,302     | 29,849       | 15,013     |
| Total length (bp)            | 58,894,508 | 29,920,371 | 39,721,466   | 23,760,199 |
| N50                          | 2,516      | 1,935      | 2,446        | 1,814      |
| Mismatches (#N's per 100kbp) | 0.00       | 0.00       | 144.97       | 96.38      |
